# Supplementary material
Source: publisher figshare collection journal article supplement (https://acs.figshare.com/ndownloader/files/23313197)
Supplement: Supplementary file 1 [file 23313197]

## Supporting Information

### Water-Dispersible Fluorescent Carbon Dots as Bioimaging Agents and Probes for Hg<sup>2+</sup> and Cu<sup>2+</sup> ions

Madhuri Bhatt<sup>a,b</sup>, Shreya Bhatt<sup>a,b</sup>, Gaurav Vyas<sup>a,b</sup>, Ishan H. Raval<sup>a</sup>, Soumya Halder<sup>a,b</sup> and Parimal Paul<sup>a,b\*</sup>

<sup>a</sup>Analytical and Environmental Science Division and Centralized Instrument Facility, CSIR-Central Salt and Marine Chemicals Research Institute, G. B. Marg, Bhavnagar 364002, India.

<sup>b</sup>Academy of Scientific and Innovative Research (AcSIR), Ghaziabad- 201002, India.

Corresponding author: E-mail: [ppaul@csmcri.res.in](mailto:ppaul@csmcri.res.in) (P. Paul),

---

#### Table of Content

| Figure No. | Figure Caption                                                                                                                                                                                | Page No. |
|------------|-----------------------------------------------------------------------------------------------------------------------------------------------------------------------------------------------|----------|
| Figure S1  | AFM image of N-CD, insert: height along Z-axis.                                                                                                                                               | S4       |
| Figure S2  | Fluorescence spectral change of N-CD in presence NaCl (0.5 to 5.0 %)                                                                                                                          | S5       |
| Figure S3  | Fluorescence spectral change of N-CD at different pH (pH 1-12) in aqueous media.                                                                                                              | S6       |
| Figure S4  | Fluorescence spectral change of N-CD in presence of various solvents.                                                                                                                         | S7       |
| Figure S5  | Bar diagram showing change in fluorescence intensity of N-CD at 415 nm upon addition of various metal ions (20 $\mu$ M)                                                                       | S8       |
| Figure S6  | Fluorescence spectral change of N-CD in presence of Cu <sup>2+</sup> and Hg <sup>2+</sup> and after addition of ATP into the solution of N-CD-M <sup>2+</sup> (Metal:ATP molar ratio is 1:2). | S9       |
| Figure S7  | Plot of fluorescence quenching efficiency of N-CD as a function of time with different concentration of Hg <sup>2+</sup> .                                                                    | S10      |

|            |                                                                                                                                                                                                                                                                                                                                                                                                                   |     |
|------------|-------------------------------------------------------------------------------------------------------------------------------------------------------------------------------------------------------------------------------------------------------------------------------------------------------------------------------------------------------------------------------------------------------------------|-----|
| Figure S8  | Plot of fluorescence quenching efficiency of N-CD as a function of time with different concentration of $\text{Cu}^{2+}$ .                                                                                                                                                                                                                                                                                        | S11 |
| Figure S9  | The change in quenching intensity $[(F_0/F)-I]$ of N-CD as a function of the concentration of $\text{Hg}^{2+}$ .                                                                                                                                                                                                                                                                                                  | S12 |
| Figure S10 | (a) Fluorescence titration of N-CD upon addition of incremental amount of $\text{Cu}^{2+}$ (0.10 $\mu\text{M}$ to 0.18 mM), (b) the change in quenching intensity $[(F_0/F)-I]$ as a function of the concentration of $\text{Cu}^{2+}$ and (c) its linear portion for calculation of quenching constant and to determine concentration of metal ion in unknown solution.                                          | S13 |
| Figure S11 | Bar diagram of competitive selectivity of N-CD towards $\text{Hg}^{2+}$ (25 $\mu\text{M}$ ). Black bar represents the fluorescence intensity at 415 nm of N-CD. The Purple bar represents the fluorescence intensity at 415 nm of N-CD in the presence of $\text{Hg}^{2+}$ . The green bars represent the fluorescence intensity at 415 nm upon the subsequent addition of different cations (50 $\mu\text{M}$ ). | S14 |
| Figure S12 | Bar diagram of competitive selectivity of N-CD towards $\text{Cu}^{2+}$ (25 $\mu\text{M}$ ). Black bar represents the fluorescence intensity at 415 nm of N-CD. Blue bar represents the fluorescence intensity at 415 nm of N-CD in the presence of $\text{Cu}^{2+}$ . The purple bars represent the fluorescence intensity at 415 nm upon the subsequent addition of different cations (50 $\mu\text{M}$ ).      | S15 |
| Figure S13 | (a) Emission decay of N-CD in presence of $\text{Cu}^{2+}$ , experimental (dotted curve) and the fitted curve (full line) in aqueous medium and (b) Emission decay of N-CD in presence of $\text{Hg}^{2+}$ , experimental (dotted curve) and the fitted curve (full line) in aqueous medium.                                                                                                                      | S16 |
| Figure S14 | Ratios of emission life-time of N-CD with different concentration of (a) $\text{Cu}^{2+}$ ion and (b) $\text{Hg}^{2+}$ ion.                                                                                                                                                                                                                                                                                       | S17 |
| Figure S15 | UV-vis spectra of N-CD, $\text{Hg}^{2+}$ and $\text{Cu}^{2+}$ solutions with perchlorate anion (50 $\mu\text{M}$ ) and N-CD upon addition of $\text{Hg}^{2+}$ and $\text{Cu}^{2+}$ solutions.                                                                                                                                                                                                                     | S18 |
| Figure S16 | Plot for estimation of $\text{Hg}^{2+}$ ion in real samples using the linear segment of the standard curve obtained from fluorescence titration of N-CD using standard solutions of $\text{Hg}^{2+}$ .                                                                                                                                                                                                            | S19 |

|            |                                                                                                                                                                                                                                                                                                                                                                                     |     |
|------------|-------------------------------------------------------------------------------------------------------------------------------------------------------------------------------------------------------------------------------------------------------------------------------------------------------------------------------------------------------------------------------------|-----|
| Figure S17 | Plot for estimation of $\text{Cu}^{2+}$ ion in real samples using the linear segment of the standard curve obtained from fluorescence titration of N-CD using standard solutions of $\text{Cu}^{2+}$ .                                                                                                                                                                              | S20 |
| Figure S18 | Paper strips coated with N-CD, (a) dipped into aqueous solution of different metal ions ( $5\ \mu\text{M}$ ) for five minutes and dried in air (colour change was noted for $\text{Cu}^{2+}$ and $\text{Hg}^{2+}$ ) and (b) a pinch of solid $\text{HgCl}_2$ and $\text{CuCl}_2$ were kept on the strips and were removed after five minutes (colour change of the spot was noted). | S21 |
| Figure S19 | Mortality percentage (%) calculation for N-CD, N-CD- $\text{Cu}^{2+}$ and N-CD- $\text{Hg}^{2+}$ .                                                                                                                                                                                                                                                                                  | S22 |
| Table S1   | Real sample analysis for $\text{Hg}^{2+}$ and $\text{Cu}^{2+}$ in water using N-CD and ICP-MS.                                                                                                                                                                                                                                                                                      | S23 |

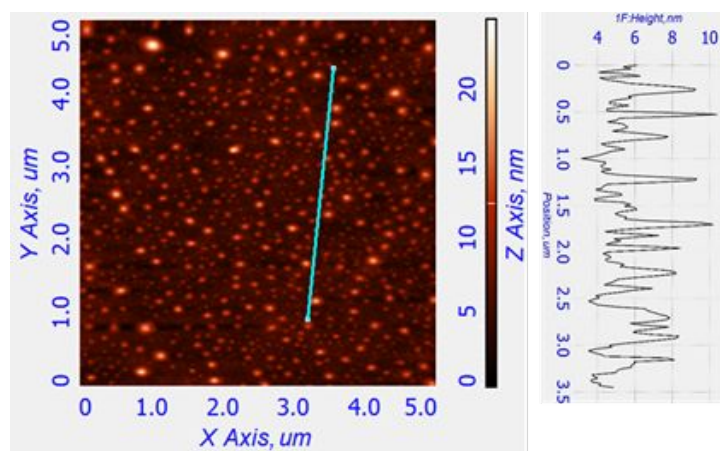

Figure S1. AFM image of N-CD, insert: height along Z-axis.

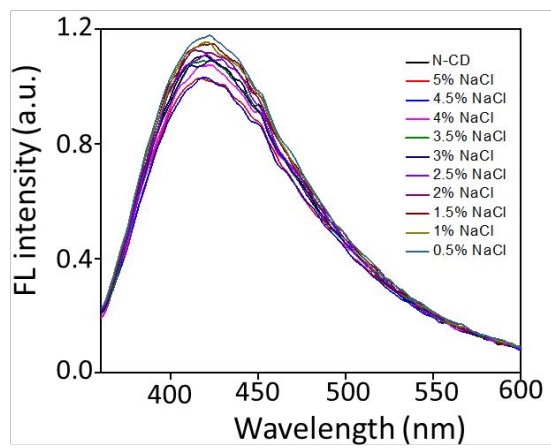

Figure S2. Fluorescence spectral change of N-CD in presence NaCl (0.5 to 5.0 %).

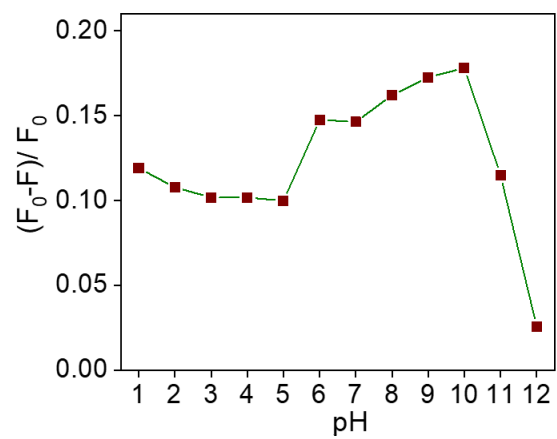

Figure S3. Fluorescence spectral change of N-CD at different pH (pH 1-12) in aqueous media.

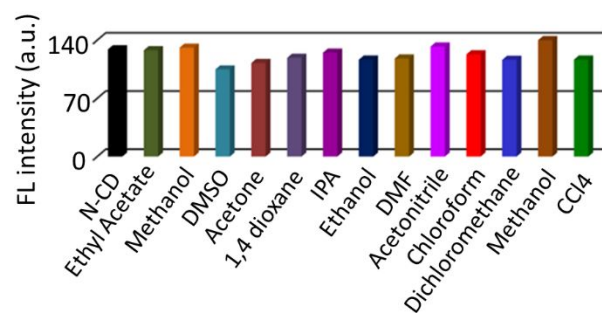

Figure S4. Fluorescence intensity of N-CD in various solvents.

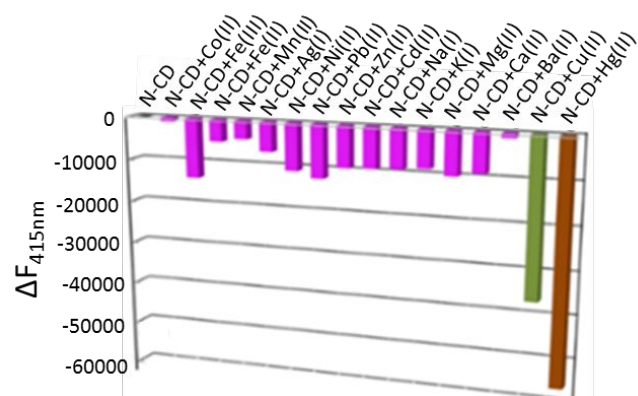

Figure S5. Bar diagram showing change in fluorescence intensity of N-CD at 415 nm upon addition of various metal ions (20  $\mu$ M).



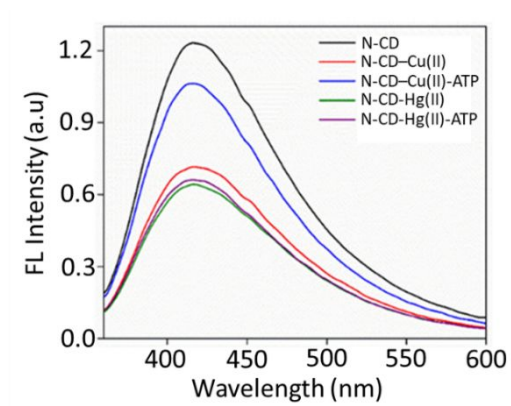

Figure S6. Fluorescence spectral change of N-CD in presence of  $\text{Cu}^{2+}$  and  $\text{Hg}^{2+}$  and after addition of ATP into the solution of N-CD- $\text{M}^{2+}$  (Metal: ATP molar ratio is 1:2).

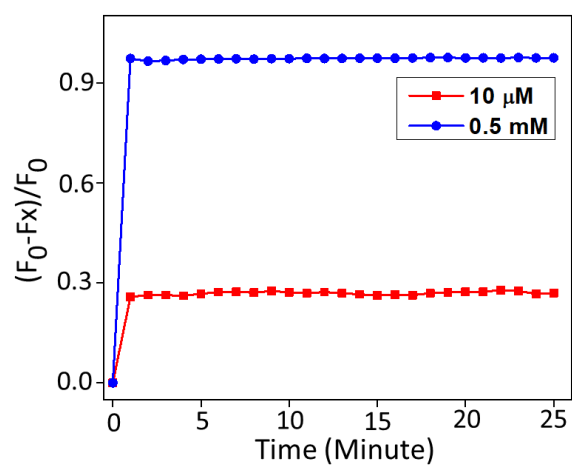

Figure S7. Plot of fluorescence quenching efficiency of N-CD as a function of time with different concentration of  $\text{Hg}^{2+}$ .

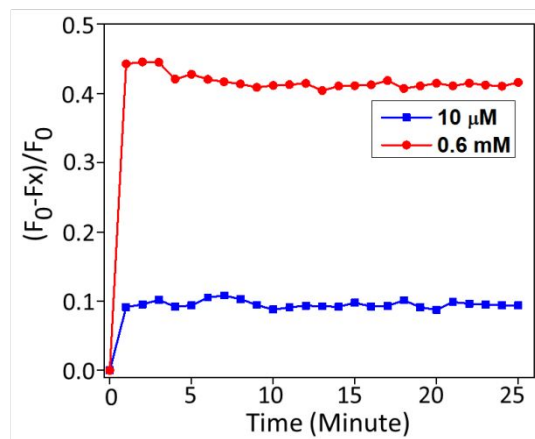

Figure S8. Plot of fluorescence quenching efficiency of N-CD as a function of time with different concentration of  $\text{Cu}^{2+}$ .

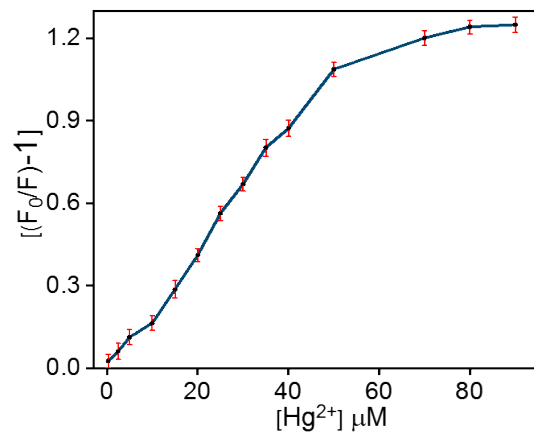

Figure S9. The change in quenching intensity  $[(F_0/F)-1]$  of N-CD as a function of the concentration of  $\text{Hg}^{2+}$ .

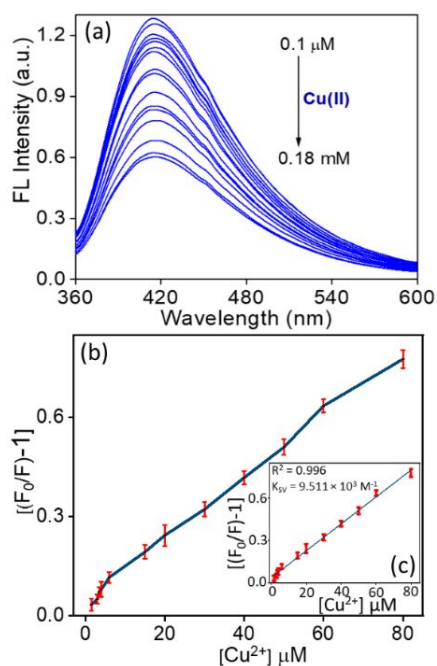

Figure S10. (a) Fluorescence titration of N-CD upon addition of incremental amount of  $\text{Cu}^{2+}$  (0.10  $\mu\text{M}$  to 0.18 mM), (b) the change in quenching intensity  $[(F_0/F)-1]$  as a function of the concentration of  $\text{Cu}^{2+}$  and (c) its linear portion for calculation of quenching constant and to determine concentration of metal ion in unknown solution.

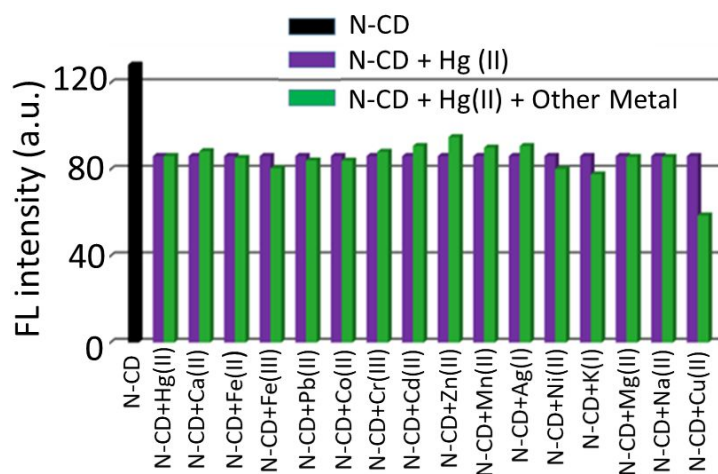

Figure S11. Bar diagram of competitive selectivity of N-CD towards  $\text{Hg}^{2+}$  (25  $\mu\text{M}$ ). Black bar represents the fluorescence intensity at 415 nm of N-CD. The Purple bar represents the fluorescence intensity at 415 nm of N-CD in the presence of  $\text{Hg}^{2+}$ . The green bars represent the fluorescence intensity at 415 nm upon the subsequent addition of different cations (50  $\mu\text{M}$ ).

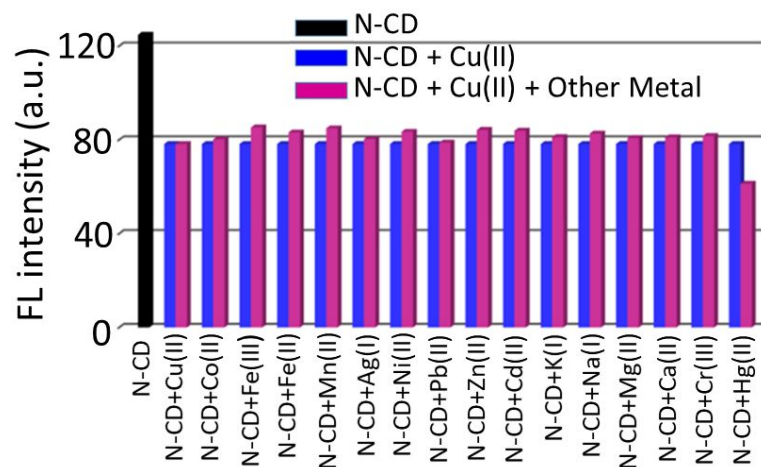

Figure S12. Bar diagram of competitive selectivity of N-CD towards Cu<sup>2+</sup> (25 μM). Black bar represents the fluorescence intensity at 415 nm of N-CD. Blue bar represents the fluorescence intensity at 415 nm of N-CD in the presence of Cu<sup>2+</sup>. The purple bars represent the fluorescence intensity at 415 nm upon the subsequent addition of different cations (50 μM).

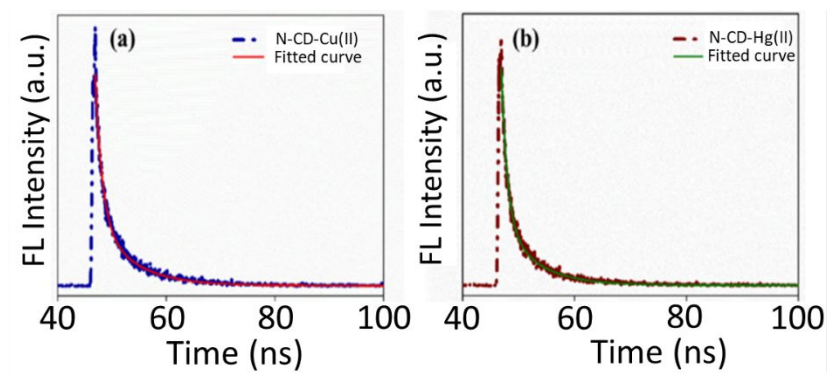

Figure S13. (a) Emission decay of N-CD in presence of  $\text{Cu}^{2+}$ , experimental (dotted curve) and the fitted curve (full line) in aqueous medium and (b) Emission decay of N-CD in presence of  $\text{Hg}^{2+}$ , experimental (dotted curve) and the fitted curve (full line) in aqueous medium.



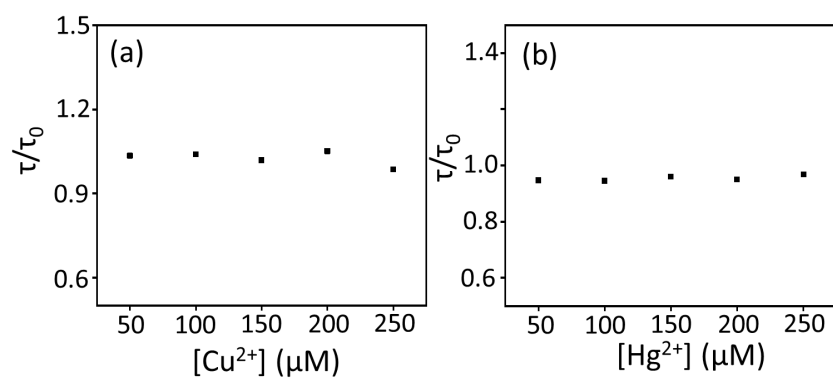

Figure S14. Ratios of emission life-time of N-CD with different concentration of (a)  $\text{Cu}^{2+}$  ion and (b)  $\text{Hg}^{2+}$  ion.

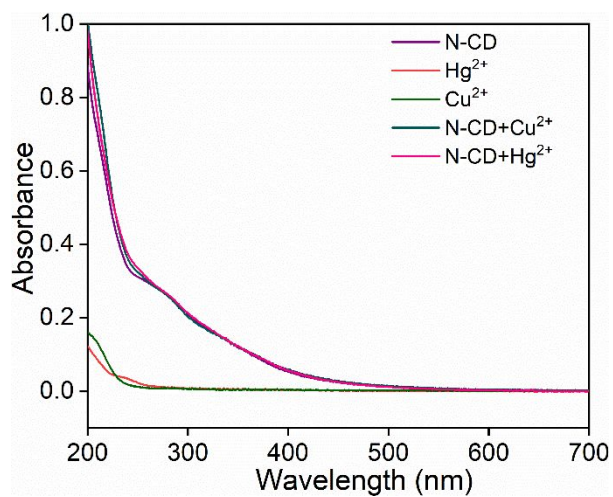

Figure S15. UV-vis spectra of N-CD,  $\text{Hg}^{2+}$  and  $\text{Cu}^{2+}$  solutions with perchlorate anion ( $50 \mu\text{M}$ ) and N-CD upon addition of  $\text{Hg}^{2+}$  and  $\text{Cu}^{2+}$  solutions.

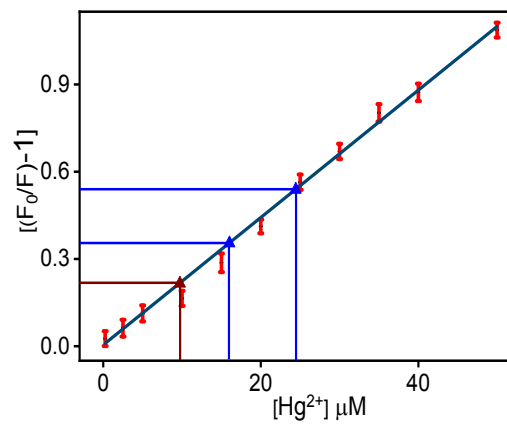

Figure S16. Plot for estimation of  $\text{Hg}^{2+}$  ion in real samples using the linear segment of the standard curve obtained from fluorescence titration of N-CD using standard solutions of  $\text{Hg}^{2+}$ .

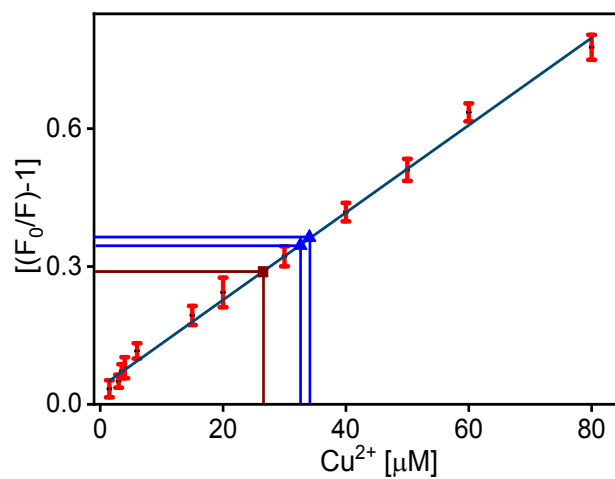

Figure S17. Plot for estimation of  $\text{Cu}^{2+}$  ion in real samples using the linear segment of the standard curve obtained from fluorescence titration of N-CD using standard solutions of  $\text{Cu}^{2+}$ .

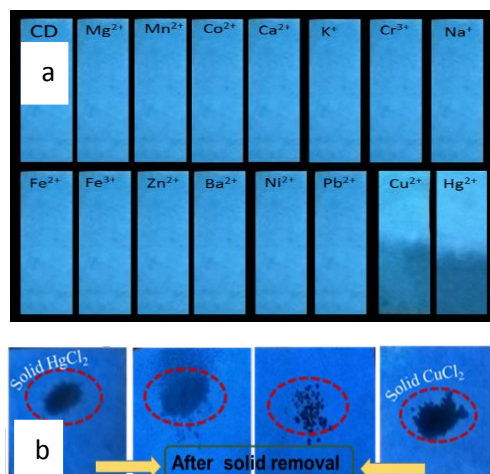

Figure S18. Paper strips coated with N-CD, (a) dipped into aqueous solution of different metal ions ( $5 \mu M$ ) for five minutes and dried in air (colour change was noted for  $Cu^{2+}$  and  $Hg^{2+}$ ) and (b) a pinch of solid  $HgCl_2$  and  $CuCl_2$  were kept on the strips and were removed after five minutes (colour change of the spot was noted).

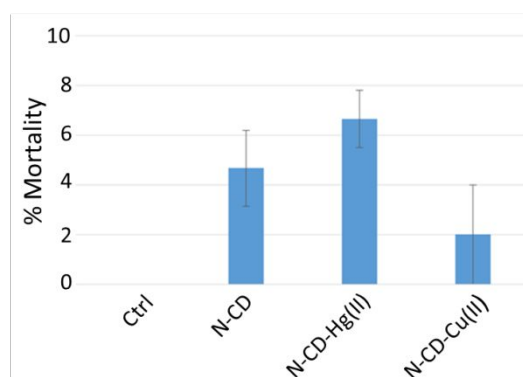

Figure S19. Mortality percentage (%) calculation for N-CD, N-CD-Cu<sup>2+</sup> and N-CD-Hg<sup>2+</sup>.

**Table S1. Real Sample Analysis for Hg<sup>2+</sup> and Cu<sup>2+</sup> in Water Using N-CD and ICP-MS**

| sample ID                           | spiked amount (μM) | ICP-MS (μM) | using N-CD (μM) | recovery (%) |
|-------------------------------------|--------------------|-------------|-----------------|--------------|
| Hg <sup>2+</sup>                    |                    |             |                 |              |
| DW 1                                | 10.00              | 12.81       | 10.73           | 107.3        |
| TW 1                                | 15.00              | 17.73       | 16.04           | 106.9        |
| TW 1                                | 25.00              | 25.29       | 24.39           | 97.5         |
| Cu <sup>2+</sup>                    |                    |             |                 |              |
| DW 1                                | 25.00              | 23.68       | 26.51           | 106.0        |
| TW 1                                | 30.00              | 27.38       | 32.59           | 108.6        |
| TW 2                                | 35.00              | 35.25       | 34.05           | 97.2         |
| DW = Drinking water, TW = Tap water |                    |             |                 |              |
